# Supplementary material for: An evaluation of daily precipitation from a regional atmospheric reanalysis over Australia
Source: Copernicus journal article supplement (doi:10.5194/hess-23-3387-2019), 2019-08-19
Supplement: Supplementary file [file hess-23-3387-2019-supplement-title-page.pdf › hess-23-3387-2019-supplement-title-page.pdf]

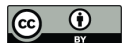

## *Supplement of*

# **An evaluation of daily precipitation from a regional atmospheric reanalysis over Australia**

**Suwash Chandra Acharya et al.**

*Correspondence to:* Suwash Chandra Acharya ([suwasha@student.unimelb.edu.au](mailto:suwasha@student.unimelb.edu.au))

- [hess-23-3387-2019-supplement-title-page.pdf](#)
- [Supplement.docx](#)
- [evalFunc.txt](#)

The copyright of individual parts of the supplement might differ from the CC BY 4.0 License.
